## Optogenetic Control of Programmable Genome Editing by Photoactivatable CRISPR/Cas9 Nanosystem in the Second Near-Infrared Window

Xiaohong Chen, Yuxuan Chen, Huhu Xin, Tao Wan, Yuan Ping\*

\*Corresponding Author: [pingy@zju.edu.cn](mailto:pingy@zju.edu.cn)

This manuscript has been withdrawn by the authors as it was submitted and made public without the full consent of all the authors. Therefore, the authors do not wish this work to be cited as reference for the project. If you have any questions, please contact the corresponding author.
